# Supplementary material for: Reengineering Tumor Microenvironment with Sequential Interleukin Delivery
Source: MDPI journal article supplement (doi:10.3390/bioengineering8070090), 2021-06-30
Supplement: s1 [file s1]

## Supplemental Figures

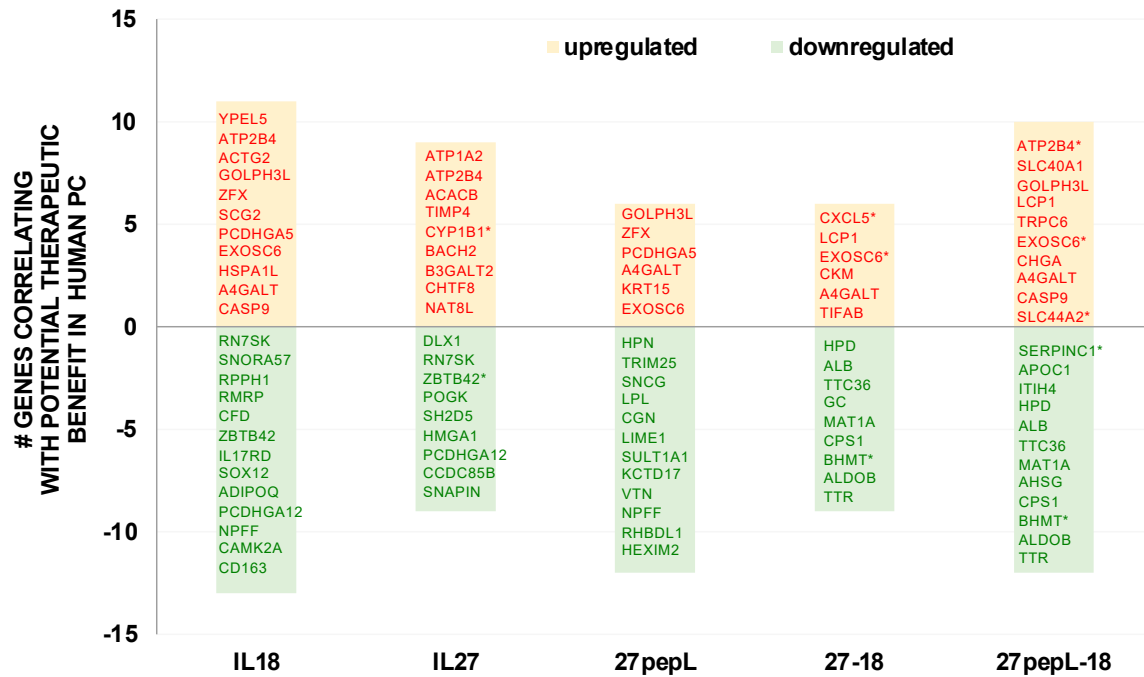

**Figure S1. Patterns of Gene Expression and their correlation with potential therapeutic benefit in human prostate tumors.** The Cambridge dataset was utilized with camCAPP and ANOVA analysis used to determine Gene Profile and Survival correlations at  $p < 0.05$ . The top 50 or bottom 50 differentially expressed genes were used from each treatment for this comparison. Red, denotes upregulated genes and Green, denotes downregulated genes. \*, gene expression pattern correlates with higher survival (using camCAPP recursive partitioning analysis at  $p < 0.05$ ).

| A IL18         |                                   |                    |                       | B IL27                      |                            |                    |                       | C 27pepL         |                              |                    |                       |
|----------------|-----------------------------------|--------------------|-----------------------|-----------------------------|----------------------------|--------------------|-----------------------|------------------|------------------------------|--------------------|-----------------------|
| UR: top 30     |                                   |                    |                       | UR: top 30                  |                            |                    |                       | UR: top 26       |                              |                    |                       |
| 18 UR          | Molecule Type                     | Activation z-score | B-H corrected p-value | 27 Upstream Regulator       | Molecule Type              | Activation z-score | B-H corrected p-value | 27pepL UR        | Molecule Type                | Activation z-score | B-H corrected p-value |
| RICTOR         | other                             | 4.848              | 1.03E-09              | IFNG                        | cytokine                   | 8.313              | 2.13E-73              | TNf              | cytokine                     | 3.755              | 5.50E-10              |
| LARP1          | translation regulator             | 4.58               | 5.99E-13              | Interferon alpha            | group                      | 6.512              | 4.77E-37              | CSF1             | cytokine                     | 2.935              | 1.38E-03              |
| TNf            | cytokine                          | 3.906              | 7.80E-06              | STAT1                       | transcription regulator    | 6.454              | 4.43E-50              | CD40             | transmembrane receptor       | 2.716              | 5.53E-02              |
| PGR            | ligand-dependent nuclear receptor | 3.513              | 2.43E-02              | IL33                        | cytokine                   | 6.319              | 9.45E-36              | SIRT3            | enzyme                       | 2.629              | 5.13E-07              |
| TGFb1          | growth factor                     | 3.422              | 2.80E-07              | CSF2                        | cytokine                   | 6.106              | 1.75E-28              | Interferon alpha | group                        | 2.551              | 7.57E-03              |
| CSF1           | cytokine                          | 3.406              | 1.32E-03              | NFkB (complex)              | complex                    | 5.901              | 1.62E-15              | Immunoglobulin   | complex                      | 2.533              | 6.94E-06              |
| SIRT3          | enzyme                            | 3.301              | 1.97E-05              | IRF7                        | transcription regulator    | 5.687              | 1.28E-22              | IL18             | cytokine                     | 2.531              | 6.77E-02              |
| CPT1b          | enzyme                            | 3.19               | 7.84E-06              | TGM2                        | enzyme                     | 5.599              | 3.93E-14              | Tnf (family)     | group                        | 2.407              | 7.20E-02              |
| IL6            | cytokine                          | 3.115              | 2.31E-02              | IL5                         | cytokine                   | 5.552              | 3.23E-14              | IL3              | cytokine                     | 2.395              | 9.81E-03              |
| WNT3A          | cytokine                          | 2.965              | 1.22E-02              | SMARCA4                     | transcription regulator    | 5.344              | 9.25E-09              | mir-33           | microRNA                     | 2.236              | 2.78E-04              |
| AGT            | growth factor                     | 2.946              | 8.25E-07              | AGT                         | growth factor              | 5.222              | 7.20E-26              | CCN5             | growth factor                | 2.236              | 7.99E-03              |
| FLCN           | other                             | 2.798              | 1.04E-04              | IRF3                        | transcription regulator    | 5.213              | 4.99E-08              | IFNA1/IFNA13     | cytokine                     | 2.232              | 1.05E-02              |
| KLF4           | transcription regulator           | 2.485              | 3.59E-02              | SPI1                        | transcription regulator    | 5.184              | 6.17E-19              | miR-2392         | mature microRNA              | 2.235              | 1.19E-06              |
| SP1            | transcription regulator           | 2.476              | 2.96E-02              | IL2                         | cytokine                   | 5.144              | 4.33E-26              | FLCN             | other                        | 2.232              | 1.55E-03              |
| KRAS           | enzyme                            | 2.454              | 3.79E-05              | IFNA2                       | cytokine                   | 5.11               | 1.44E-20              | mir-2392         | microRNA                     | 2.228              | 1.19E-06              |
| mir-2392       | mature microRNA                   | 2.441              | 8.25E-07              | P38 MAPK                    | group                      | 5.01               | 3.83E-09              | N-cor            | group                        | 2.219              | 2.72E-04              |
| PDGF BB        | complex                           | 2.439              | 8.25E-07              | IL18                        | cytokine                   | 4.821              | 7.81E-34              | TNFRSF9          | transmembrane receptor       | 2.219              | 5.77E-04              |
| ERBB2          | kinase                            | 2.429              | 1.12E-04              | TLR3                        | transmembrane receptor     | 4.777              | 9.84E-12              | CD28             | transmembrane receptor       | 2.137              | 5.47E-02              |
| ETS1           | transcription regulator           | 2.421              | 2.55E-02              | TNf                         | cytokine                   | 4.754              | 2.74E-46              | IL15             | cytokine                     | 2.117              | 8.44E-02              |
| NR1H4          | ligand-dependent nuclear receptor | 2.417              | 2.55E-02              | NONO                        | transcription regulator    | 4.748              | 2.86E-12              | CSF2             | cytokine                     | 2.079              | 7.02E-02              |
| NFAT5          | transcription regulator           | 2.393              | 4.94E-02              | Igf                         | complex                    | 4.71               | 6.51E-20              | RELA             | transcription regulator      | 2.052              | 3.97E-02              |
| PI3K (complex) | complex                           | 2.386              | 2.20E-02              | ELAVL1                      | other                      | 4.629              | 2.89E-11              | MEX3A            | other                        | 2                  | 1.39E-02              |
| TEAD4          | transcription regulator           | 2.373              | 1.43E-03              | TLR9                        | transmembrane receptor     | 4.585              | 9.84E-12              | MALAT1           | other                        | 2                  | 1.76E-02              |
| IL3            | cytokine                          | 2.297              | 4.27E-03              | G protein alpai             | group                      | 4.583              | 3.86E-20              | ASXL1            | transcription regulator      | 2                  | 1.87E-02              |
| RET            | kinase                            | 2.217              | 8.84E-03              | ARNT2                       | transcription regulator    | 4.583              | 4.81E-07              | USP22            | peptidase                    | 2                  | 1.98E-02              |
| Ccl2           | cytokine                          | 2.177              | 4.34E-02              | SIM1                        | transcription regulator    | 4.571              | 3.07E-12              | Msp3k7           | kinase                       | 2                  | 5.88E-02              |
| CTNNB1         | transcription regulator           | 2.174              | 9.54E-16              | MYD88                       | transmembrane receptor     | 4.567              | 2.02E-12              |                  |                              |                    |                       |
| PTH            | other                             | 2.158              | 3.93E-03              | TLR4                        | transmembrane receptor     | 4.499              | 2.17E-19              |                  |                              |                    |                       |
| P38 MAPK       | group                             | 2.128              | 2.49E-03              | ---                         | ---                        | ---                | ---                   |                  |                              |                    |                       |
| UR: bot 18     |                                   |                    |                       | UR: bot 30                  |                            |                    |                       | UR: bot 30       |                              |                    |                       |
| PPARGC1B       | transcription regulator           | -2.02              | 1.07E-02              | COP1                        | enzyme                     | -2.97              | 3.82E-07              | MLXIPL           | transcription regulator      | -2.415             | 3.02E-03              |
| MALSU1         | other                             | -2.236             | 6.24E-06              | mir-155                     | microRNA                   | -2.987             | 4.66E-04              | BCL6             | transcription regulator      | -2.415             | 6.96E-02              |
| MRPL14         | other                             | -2.236             | 1.84E-05              | RNF31                       | enzyme                     | -3                 | 4.85E-04              | MRPL12           | other                        | -2.423             | 1.43E-08              |
| PTCD1          | other                             | -2.236             | 1.48E-04              | NRAS                        | enzyme                     | -3.048             | 1.38E-13              | HNFAcEs dimer    | complex                      | -2.425             | 1.33E-06              |
| LONP1          | peptidase                         | -2.309             | 8.06E-07              | GFI1                        | transcription regulator    | -3.064             | 1.51E-04              | T3-TR-RXR        | complex                      | -2.425             | 4.01E-04              |
| ALKBH1         | enzyme                            | -2.449             | 8.25E-07              | miR-34a-5p (and other miRNA | mature microRNA            | -3.148             | 6.46E-03              | PPARGC1B         | transcription regulator      | -2.438             | 5.49E-03              |
| NSUN3          | enzyme                            | -2.449             | 8.25E-07              | CBS                         | transcription regulator    | -3.162             | 2.75E-03              | GC-GCR dimer     | complex                      | -2.449             | 5.25E-06              |
| CAB39L         | kinase                            | -2.478             | 2.52E-05              | miR-155-5p (miRNAs w/seed   | mature microRNA            | -3.238             | 8.95E-03              | Uf               | cytokine                     | -2.559             | 6.36E-07              |
| FASN           | enzyme                            | -2.607             | 2.56E-02              | PTGER4                      | G-protein coupled receptor | -3.256             | 4.51E-15              | CREBBP           | transcription regulator      | -2.577             | 2.24E-03              |
| MRPL12         | other                             | -2.613             | 1.16E-08              | NCSTN                       | peptidase                  | -3.302             | 1.08E-08              | SOCs1            | other                        | -2.607             | 2.36E-02              |
| ADAM12         | peptidase                         | -2.8               | 1.27E-02              | RC3H1                       | enzyme                     | -3.302             | 2.96E-08              | CEBPA            | transcription regulator      | -2.615             | 2.05E-12              |
| TWNK           | enzyme                            | -2.813             | 5.56E-06              | IL1RN                       | cytokine                   | -3.324             | 7.89E-09              | ESR2             | ligand-dep. nuclear receptor | -2.643             | 7.74E-03              |
| Lh             | complex                           | -3.139             | 3.77E-08              | APOE                        | transporter                | -3.618             | 4.36E-16              | KDM6A            | enzyme                       | -2.646             | 3.33E-05              |
| DAF3           | other                             | -3.162             | 1.36E-11              | MAPK1                       | kinase                     | -3.656             | 1.29E-10              | PKD1             | ion channel                  | -2.714             | 2.11E-03              |
| DDX5           | enzyme                            | -3.512             | 9.50E-09              | ZC3H12C                     | other                      | -3.675             | 2.65E-13              | NFE2L2           | transcription regulator      | -2.791             | 9.48E-09              |
| MYCN           | transcription regulator           | -3.52              | 2.75E-08              | SMARCA5                     | transcription regulator    | -3.691             | 3.00E-13              | ACOX1            | enzyme                       | -2.794             | 2.61E-14              |
| MYC            | transcription regulator           | -4.096             | 8.46E-13              | PSMB11                      | peptidase                  | -3.71              | 5.10E-11              | PPARGC1A         | transcription regulator      | -2.811             | 1.06E-05              |
| MLXIPL         | transcription regulator           | -5.251             | 4.32E-18              | TGFB2                       | kinase                     | -3.825             | 6.24E-08              | Hmg3n            | other                        | -2.813             | 6.93E-16              |
|                |                                   |                    |                       | PIK3CG                      | kinase                     | -4.055             | 2.36E-24              | TWNK             | enzyme                       | -2.813             | 3.82E-08              |
|                |                                   |                    |                       | ACKR2                       | G-protein coupled receptor | -4.085             | 3.32E-15              | DAP3             | other                        | -2.828             | 1.95E-10              |
|                |                                   |                    |                       | PNPT1                       | enzyme                     | -4.333             | 1.32E-16              | LONP1            | peptidase                    | -2.828             | 2.52E-04              |
|                |                                   |                    |                       | IL10RA                      | transmembrane receptor     | -4.397             | 6.25E-47              | FST              | other                        | -2.985             | 1.22E-05              |
|                |                                   |                    |                       | SIRT1                       | transcription regulator    | -4.401             | 1.40E-21              | PEBP1            | other                        | -3                 | 3.08E-07              |
|                |                                   |                    |                       | ETV6-RUNX1                  | fusion gene/product        | -4.428             | 1.05E-11              | FASN             | enzyme                       | -3.36              | 4.62E-12              |
|                |                                   |                    |                       | HOXA10                      | transcription regulator    | -4.447             | 1.25E-08              | NR3C1            | ligand-dep. nuclear receptor | -3.428             | 1.51E-09              |
|                |                                   |                    |                       | TRIM24                      | transcription regulator    | -4.572             | 1.27E-15              | PPARG            | ligand-dep. nuclear receptor | -3.498             | 5.96E-14              |
|                |                                   |                    |                       | INSIG1                      | other                      | -4.929             | 1.26E-16              | ADIPOQ           | other                        | -3.797             | 7.23E-23              |
|                |                                   |                    |                       | SOCs1                       | other                      | -4.949             | 2.34E-21              | SMARCB1          | transcription regulator      | -4.078             | 4.41E-08              |
|                |                                   |                    |                       | Irgm1                       | other                      | -4.995             | 2.06E-18              | HNFA4A           | transcription regulator      | -4.225             | 4.23E-07              |
|                |                                   |                    |                       | mir-21                      | microRNA                   | -5.972             | 2.87E-19              | HNFA1A           | transcription regulator      | -4.457             | 2.73E-18              |

**Figure S2. Upstream Regulators (UR) from IPA analyses, single therapies.** (A) UR predicted in IL-18-treated tumors; (B) UR in IL27-treated tumors; (C) UR in IL-27pepL-treated tumors. *Red*, predicted as activated upstream regulators and ranked by z-score; *Green*, predicted as inhibited upstream regulators, ranked by z-score. Shown are the UR meeting the cutoff of activation z-score >2.0 or <-2.0 and a B-H corrected p value < 0.05.

## A 27→18

### UR: top 30

| 27_18 UR | Molecule Type              | Activation z-score | B-H corrected p-value |
|----------|----------------------------|--------------------|-----------------------|
| IFNG     | cytokine                   | 3.681              | 1.04E-08              |
| CSF1     | cytokine                   | 3.655              | 2.31E-06              |
| IL21     | cytokine                   | 3.383              | 5.64E-04              |
| TLR4     | transmembrane receptor     | 3.204              | 1.40E-04              |
| LDL      | complex                    | 3.177              | 5.42E-03              |
| MYD88    | other                      | 3.06               | 8.44E-05              |
| P38 MAPK | group                      | 3.05               | 1.00E-02              |
| TLR3     | transmembrane receptor     | 2.92               | 4.62E-02              |
| CSF2     | cytokine                   | 2.886              | 8.97E-03              |
| IL2      | cytokine                   | 2.873              | 3.60E-02              |
| IL5      | cytokine                   | 2.872              | 1.84E-02              |
| PARP1    | enzyme                     | 2.809              | 7.00E-03              |
| IL1B     | cytokine                   | 2.803              | 2.36E-07              |
| FFAR3    | G-protein coupled receptor | 2.739              | 3.68E-06              |
| TGM2     | enzyme                     | 2.714              | 1.02E-02              |
| TNF      | cytokine                   | 2.681              | 1.50E-05              |
| F2RL1    | G-protein coupled receptor | 2.621              | 1.37E-03              |
| CARD9    | other                      | 2.611              | 1.86E-05              |
| STAT1    | transcription regulator    | 2.61               | 4.56E-11              |
| APP      | other                      | 2.513              | 1.19E-06              |
| IL17A    | cytokine                   | 2.482              | 1.20E-02              |
| TNFSF11  | cytokine                   | 2.465              | 4.85E-03              |
| USP22    | peptidase                  | 2.449              | 1.08E-03              |
| SELP1G   | other                      | 2.449              | 1.08E-03              |
| HRG      | other                      | 2.449              | 2.02E-05              |
| LGALS3   | other                      | 2.425              | 5.16E-03              |
| PF4      | cytokine                   | 2.416              | 1.19E-02              |
| Ige      | complex                    | 2.412              | 1.54E-03              |
| HMGB1    | transcription regulator    | 2.41               | 5.40E-03              |
| IL3      | cytokine                   | 2.4                | 1.96E-03              |

### UR: bot 30

|                                      |                                   |        |          |
|--------------------------------------|-----------------------------------|--------|----------|
| USF2                                 | transcription regulator           | -2.2   | 8.78E-03 |
| AIRE                                 | transcription regulator           | -2.2   | 4.30E-03 |
| RNF31                                | enzyme                            | -2.2   | 2.63E-03 |
| Td 1/3/4                             | group                             | -2.2   | 4.15E-07 |
| ST8SIA1                              | enzyme                            | -2.207 | 3.79E-04 |
| B4GALNT1                             | enzyme                            | -2.207 | 4.17E-05 |
| TRIM24                               | transcription regulator           | -2.236 | 4.61E-02 |
| HHB                                  | transporter                       | -2.236 | 7.79E-03 |
| LIPE                                 | enzyme                            | -2.236 | 2.67E-05 |
| PPARG                                | ligand-dependent nuclear receptor | -2.306 | 6.11E-08 |
| PKD1                                 | ion channel                       | -2.331 | 1.73E-03 |
| SCD                                  | enzyme                            | -2.387 | 1.96E-03 |
| PXR ligand-PXR-Retinoic acid complex | complex                           | -2.395 | 1.08E-03 |
| BCL6                                 | transcription regulator           | -2.399 | 2.98E-02 |
| miR-21                               | microRNA                          | -2.413 | 9.97E-05 |
| HNF4A dimer                          | complex                           | -2.425 | 3.70E-06 |
| FST                                  | other                             | -2.449 | 7.47E-03 |
| SMTNL1                               | other                             | -2.449 | 1.50E-04 |
| NR3C1                                | ligand-dependent nuclear receptor | -2.485 | 6.13E-05 |
| ZC3H12C                              | other                             | -2.611 | 2.25E-05 |
| KDM6A                                | enzyme                            | -2.646 | 8.99E-05 |
| Hmgn3                                | other                             | -2.813 | 1.90E-13 |
| CFTR                                 | ion channel                       | -2.905 | 1.11E-06 |
| PTGER4                               | G-protein coupled receptor        | -2.97  | 2.87E-03 |
| SOCS1                                | other                             | -2.985 | 1.48E-03 |
| ACOX1                                | enzyme                            | -3.186 | 3.72E-13 |
| IL10RA                               | transmembrane receptor            | -3.595 | 6.65E-13 |
| HNF4A                                | transcription regulator           | -3.841 | 2.13E-09 |
| ADIPOQ                               | other                             | -4.069 | 6.57E-20 |
| HNF1A                                | transcription regulator           | -4.345 | 2.81E-16 |

## B 27pepL→18

### UR: top 30

| 27pL 18 UR  | Molecule Type           | Activation z-score | B-H corrected p-value |
|-------------|-------------------------|--------------------|-----------------------|
| CSF1        | cytokine                | 3.773              | 9.94E-09              |
| TNF         | cytokine                | 3.481              | 1.23E-15              |
| RELA        | transcription regulator | 3.326              | 1.63E-03              |
| CSF2        | cytokine                | 3.266              | 2.35E-03              |
| Ige         | complex                 | 3.162              | 2.71E-05              |
| TNFSF12     | cytokine                | 3.062              | 1.12E-04              |
| IL1B        | cytokine                | 2.936              | 1.13E-09              |
| TLR3        | transmembrane receptor  | 2.889              | 2.27E-03              |
| ERK1/2      | group                   | 2.883              | 1.12E-04              |
| APP         | other                   | 2.866              | 1.93E-05              |
| SPP1        | cytokine                | 2.8                | 1.82E-03              |
| MAPKAPK2    | kinase                  | 2.789              | 5.91E-05              |
| IL33        | cytokine                | 2.788              | 5.54E-06              |
| KITLG       | growth factor           | 2.778              | 6.71E-04              |
| NFKB1       | transcription regulator | 2.723              | 3.44E-07              |
| LDL         | complex                 | 2.672              | 1.15E-03              |
| TNFSF11     | cytokine                | 2.647              | 1.70E-06              |
| IL1A        | cytokine                | 2.647              | 2.54E-06              |
| SIRT3       | enzyme                  | 2.629              | 1.02E-06              |
| EGR1        | transcription regulator | 2.626              | 4.13E-05              |
| CCK1        | other                   | 2.618              | 3.12E-03              |
| cytokine    | group                   | 2.611              | 1.54E-02              |
| SLC27A2     | transporter             | 2.606              | 7.60E-05              |
| IL18        | cytokine                | 2.592              | 1.94E-03              |
| Ccl2        | cytokine                | 2.579              | 6.71E-05              |
| IL21        | cytokine                | 2.555              | 3.55E-03              |
| MYD88       | other                   | 2.545              | 1.42E-04              |
| MAP2K1      | kinase                  | 2.543              | 4.84E-05              |
| HRG         | other                   | 2.449              | 1.15E-05              |
| collagenase | group                   | 2.449              | 1.44E-04              |

### UR: bot 30

|                      |                                   |        |          |
|----------------------|-----------------------------------|--------|----------|
| ALKBH1               | enzyme                            | -2.236 | 1.71E-06 |
| NSUN3                | enzyme                            | -2.236 | 1.71E-06 |
| PSEN1                | peptidase                         | -2.277 | 8.86E-03 |
| PXR ligand-R complex | complex                           | -2.395 | 6.54E-04 |
| MLXIP1               | transcription regulator           | -2.415 | 1.21E-03 |
| HNF4A dimer          | complex                           | -2.425 | 2.11E-06 |
| COP1                 | enzyme                            | -2.425 | 1.03E-04 |
| PPARGC1B             | transcription regulator           | -2.438 | 6.08E-03 |
| LONP1                | peptidase                         | -2.449 | 1.89E-03 |
| NR3C1                | ligand-dependent nuclear receptor | -2.531 | 4.72E-07 |
| LIF                  | cytokine                          | -2.559 | 4.08E-07 |
| MED1                 | transcription regulator           | -2.563 | 1.20E-04 |
| VIP                  | other                             | -2.617 | 9.43E-03 |
| GFI1                 | transcription regulator           | -2.63  | 4.58E-03 |
| DAP3                 | other                             | -2.646 | 2.04E-08 |
| KDM6A                | enzyme                            | -2.646 | 4.98E-05 |
| ADIPOQ               | other                             | -2.721 | 1.45E-26 |
| CFTR                 | ion channel                       | -2.744 | 5.92E-07 |
| ADAM12               | peptidase                         | -2.779 | 8.42E-07 |
| Hmgn3                | other                             | -2.813 | 6.32E-14 |
| LIPE                 | enzyme                            | -2.813 | 7.47E-05 |
| PPARGC1A             | transcription regulator           | -2.96  | 7.72E-07 |
| BCL6                 | transcription regulator           | -2.97  | 4.45E-02 |
| FST                  | other                             | -2.985 | 2.06E-05 |
| FASN                 | enzyme                            | -3.06  | 3.19E-09 |
| SOCS1                | other                             | -3.081 | 1.96E-04 |
| SMARCB1              | transcription regulator           | -3.395 | 2.35E-08 |
| PPARG                | ligand-dependent nuclear receptor | -3.483 | 3.05E-14 |
| HNF4A                | transcription regulator           | -3.819 | 5.12E-10 |
| HNF1A                | transcription regulator           | -4.457 | 1.32E-18 |

**Figure S3. Upstream Regulators from IPA analyses for the combination therapies.** Red, predicted as activated upstream regulators and ranked by z-score; Green, predicted as inhibited upstream regulators, ranked by z-score. Shown is also the p-value of the overlap.

## Supplementary Table

**Table S1.** Gene expression signatures utilized in the EPIC RNAseq cell profiling analyses.

| Signature name | Bulk Expression File | FKPM, Counts | Source             | Reference Expression File | Source          |
|----------------|----------------------|--------------|--------------------|---------------------------|-----------------|
| LMPP_gsea      | GSE116177            | FKPM         | Haemopedia         | GSE15330, M7021           | GSEA, immusigdb |
| GMP_gsea       | GSE116177            | FKPM         | Haemopedia         | GSE15330, M7041           | GSEA, immusigdb |
| MPP_gsea       | GSE116177            | FKPM         | Haemopedia         | GSE22432, M7817           | GSEA, immusigdb |
| gMDSC_gsea     | GSE140029            | FKPM         | Ref. <sup>42</sup> | GSE24102, M4541           | GSEA, immusigdb |
| mMDSC_gsea     | GSE140029            | FKPM         | Ref. <sup>42</sup> | GSE23502, M8087           | GSEA, immusigdb |
| MDSC_gsea      | GSE140029            | FKPM         | Ref. <sup>42</sup> | GSE21927, M7563           | GSEA, immusigdb |
| HSC1_gsea      | GSE109125            | Cts          | ImmGen ULI         | GSE15330, M7060           | GSEA, immusigdb |
| HSC2_gsea      | GSE109125            | Cts          | ImmGen ULI         | GSE15330, M7018           | GSEA, immusigdb |
| Macro_gsea     | GSE109125            | Cts          | Immgen             | GSE27859, M8590           | GSEA, immusigdb |
| NKT_gsea2      | GSE109125            | Cts          | Immgen             | GSE27786, M4870           | GSEA, immusigdb |
| CD8_Teff_gsea  | GSE109125            | Cts          | Immgen             | GSE1000002, M3027         | GSEA, immusigdb |
| Bcell_gsea     | GSE109125            | Cts          | Immgen             | GSE27786, M4799           | GSEA, immusigdb |
| Neutr_gsea     | GSE109125            | Cts          | Immgen             | GSE27786, M4880           | GSEA, immusigdb |
| Treg_gsea      | GSE109125            | Cts          | Immgen             | GSE13306, M3229           | GSEA, immusigdb |
| CD8_T_gsea     | GSE109125            | Cts          | Immgen             | GSE1000002, M3035         | GSEA, immusigdb |
| cDC_gsea       | GSE109125            | Cts          | Immgen             | GSE3691, M6363            | GSEA, immusigdb |
| DC8a_gsea      | GSE109125            | Cts          | Immgen             | GSE12392, M7135           | GSEA, immusigdb |
| pDC1_gsea      | GSE109125            | Cts          | Immgen             | GSE22432, M7835           | GSEA, immusigdb |
| pDC2_gsea      | GSE109125            | Cts          | Immgen             | GSE3691, M6368            | GSEA, immusigdb |
| NK11_gsea      | GSE109125            | Cts          | Immgen             | GSE13229, M3213           | GSEA, immusigdb |
| NK27_gsea      | GSE109125            | Cts          | Immgen             | GSE13229, M3205           | GSEA, immusigdb |
| NK27_11_gsea   | GSE109125            | Cts          | Immgen             | GSE13229, M3209           | GSEA, immusigdb |
| M2_gsea        | GSE109125            | Cts          | Immgen             | GSE18804, GEO2R analysis  | GSEA, immusigdb |
| Tgd_gsea       | GSE109125            | Cts          | Immgen             | GSE22196, M7655           | GSEA, immusigdb |
| Th2_gsea       | GSE109125            | Cts          | Immgen             | GSE14026, M3164           | GSEA, immusigdb |
| Th1_gsea       | GSE109125            | Cts          | Immgen             | GSE14026, M3356           | GSEA, immusigdb |
| NKT_gsea       | GSE109125            | Cts          | Immgen             | GSE3039, M6429            | GSEA, immusigdb |
| M1_gsea        | GSE109125            | Cts          | Immgen             | GSE26912, M8205           | GSEA, immusigdb |
| Plasma_gsea    | GSE109125            | Cts          | Immgen             | GSE4142, M6395            | GSEA, immusigdb |

Shown are signature names, bulk and reference files used and sources.
